# Supplementary material for: Oncogenic RAS Mutants Confer Resistance of RMS13 Rhabdomyosarcoma Cells to Oxidative Stress-Induced Ferroptotic Cell Death
Source: PubMed Central journal article supplement (PMC4476278; doi:10.3389/fonc.2015.00131), 2015-06-22

# Suppl. Figure 1

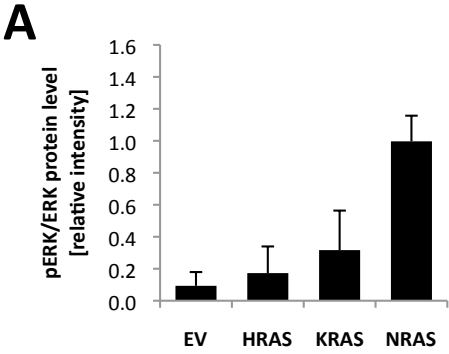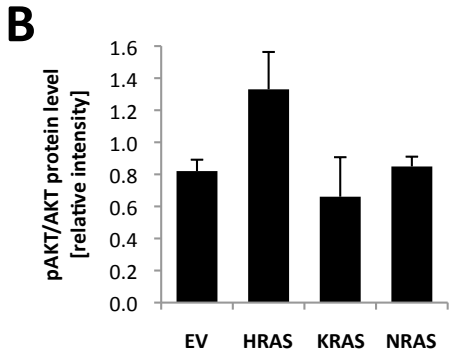

Supplement: image_1.pdf [file image_1.pdf]
